# Supplementary material for: A dual-mode probe based on AIE and TICT effects for the detection of the hypochlorite anion and its bioimaging in living cells
Source: Royal Society of Chemistry journal article supplement (doi:10.1039/d2ob02138b), 2023-01-01
Supplement: d2ob02138b1.pdf [file d2ob02138b1.pdf]

## Supporting Information

### A dual-mode probe based on AIE and TICT effects for the detection of hypochlorite anion and its bioimaging in living cells

Yang Zhou, Hai Xu, Qing-Xiu Li, Zong-Rui Hou\*, Ya-Wen Wang\*, and Yu Peng

School of Life Science and Engineering, Southwest Jiaotong University,  
Chengdu 610031, People's Republic of China

h zr@swjtu.edu.cn, ywwang@swjtu.edu.cn

### Table of Contents

|                                                                      |    |
|----------------------------------------------------------------------|----|
| 1. General Methods.....                                              | 2  |
| 2. Comparison of hypochlorite anion fluorescent probes.....          | 4  |
| 3. Synthesis of the <b>M-CHO</b> and <b>SWJT-12</b> .....            | 5  |
| 4. <sup>1</sup> H NMR and ESI-MS copies of <b>M-CHO</b> .....        | 6  |
| 5. <sup>1</sup> H NMR and MS copies of <b>SWJT-12</b> .....          | 8  |
| 6. Basic properties of <b>SWJT-12</b> .....                          | 12 |
| 7. LC-MS spectrum of probe <b>SWJT-12</b> and ClO <sup>-</sup> ..... | 19 |
| 8. Energy distribution of <b>SWJT-12</b> and <b>MB</b> .....         | 20 |
| 9. Cytotoxicity of <b>SWJT-12</b> in living HeLa cells .....         | 22 |

## 1. General Methods.

Aniline, terephthalaldehyde, acetic acid, p-Anisil, ammonium acetate, 2,3-diaminodinitrile, ethanol, deionized water,  $\text{ClO}^-$ , Cys and other analytical reagents were all purchased from Innochem Technology Co., Ltd.

$^1\text{H}$  and  $^{13}\text{C}$  NMR spectra were recorded on a Bruker AVB-400 spectrometer using TMS as the internal reference. ESI-MS spectra were acquired on a Bruker Esquire 6000 spectrometer. HRMS spectra were acquired on a Bruker micrOTOF-Q III. LC-MS spectra were acquired on an Alliance HPLC E2695. Fluorescence spectra were recorded by a Hitachi F-7000 spectrophotometer. Fluorescence imaging of  $\text{ClO}^-$  in HeLa cells was recorded on a Nikon A1R+ (Japan) laser scanning confocal microscope.

The solution of **SWJT-12** (1 mM) was prepared separately in methanol for the detection of the selectivity of the probes as ratiometric probes. Stock solutions of various analytes such as  $\text{ClO}^-$ , Cys,  $\text{K}^+$ ,  $\text{Na}^+$ ,  $\text{Zn}^{2+}$ ,  $\text{Ca}^{2+}$ ,  $\text{Mg}^{2+}$ ,  $\text{Fe}^{3+}$ ,  $\text{Cl}^-$ ,  $\text{SO}_4^{2-}$ , DTBP,  $\text{H}_2\text{O}_2$  (1.0 mM) were obtained with PBS. All detection experiments in this study were performed at 37 °C in 10 mM PBS buffer- $\text{CH}_3\text{OH}$  (98:2, v/v).

**Portable test paper** After preparing a methanol solution containing 10.0  $\mu\text{M}$  **SWJT-12**, carefully place the filter paper strip in it and soak it well. Then the filter paper strip was taken out and vacuum-dried, and finally a portable test strip was successfully produced. Subsequently, after spraying with different concentrations of  $\text{ClO}^-$ , the changes in fluorescence were directly observed from the portable test strips under 365 nm UV light irradiation.

HeLa cells (human cervical cancer cells) were plated in 96-well plates and incubated in a 5% carbon dioxide, 37°C incubator for 24h. After removing the medium, add probes of different concentrations (0, 10.0  $\mu\text{M}$ , 25.0  $\mu\text{M}$ , 50.0  $\mu\text{M}$ ) to the fresh medium for 24 hours in an incubator. Then, 10.0  $\mu\text{L}$  of MTT (5 mg/mL in PBS, pH 7.4) was added to each well, and after the cells were incubated for another 2 hours, the culture supernatant was removed, and the resulting formazan crystals were dissolved in 150  $\mu\text{L}$  of dimethyl sulfoxide. Next, the plates were incubated for an additional 10 minutes at 37°C on a shaker at 60-70 rpm. Finally, the absorbance (A)

of each well at 570 nm was measured using a microplate reader. (Cell relative viability =  $A_{\text{sample}} / A_{\text{control}} * 100\%$ ).

HeLa cells were plated in glass bottom dishes with fresh medium and incubated in a 37°C incubator for 24 hours. After washing with PBS buffer, fresh medium and 25.0  $\mu\text{M}$  probe were added and incubated for 1 h. After washing three times with PBS buffer, the medium and 150.0  $\mu\text{M}$   $\text{ClO}^-$  were added for treatment for 30 min. Finally, after washing three times with PBS buffer, the dishes were placed on a confocal laser scanning microscope for cell imaging.

## 2. Comparison of hypochlorite anion fluorescent probes.

**Table S1. The comparison of the reported ClO<sup>-</sup> fluorescent probes.**

| Probe                                                                               | AIE based | Solution                           | Fluorescence change | Theoretical calculation support | Application of portable test strips | Ref.             |
|-------------------------------------------------------------------------------------|-----------|------------------------------------|---------------------|---------------------------------|-------------------------------------|------------------|
| 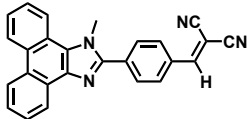   | -         | DMSO/PBS (50:50, v/v)              | Ratiometric         | ✓                               | -                                   | [10a]            |
|    | -         | DMF/PBS (5:95, v/v)                | Ratiometric         | -                               | -                                   | [10b]            |
|    | ✓         | THF/H <sub>2</sub> O (1: 4, v/v)   | Ratiometric         | ✓                               | -                                   | [10c]            |
|   | ✓         | CH <sub>3</sub> OH/PBS (1:9 v/v)   | Turn-on             | ✓                               | ✓                                   | [10d]            |
|  | ✓         | DMSO/H <sub>2</sub> O (5:95, v/v)  | Turn-on             | ✓                               | -                                   | [10e]            |
|  | ✓         | CH <sub>3</sub> OH/PBS (2:98, v/v) | Ratiometric         | ✓                               | ✓                                   | <i>This Work</i> |

### 3. Synthesis of the **M-CHO** and **SWJT-12**.

**M-CHO** was synthesized according to literature reports.<sup>12</sup> Aniline (93 mg, 1.0 mmol) and terephthalaldehyde (134 mg, 1.0 mmol) were dissolved in acetic acid (15 mL) and reacted at room temperature. After 1 h, *p*-Anisil (270 mg, 1.0 mmol) and ammonium acetate (539 mg, 7.0 mmol) were added to the reaction flask to react at 120 °C for 10 h to obtain **M-CHO**. <sup>1</sup>H NMR (400 MHz, CDCl<sub>3</sub>): δ 9.96(s, 1H), 7.75-7.72(m, 2H), 7.61-7.58(m, 2H), 7.55-7.51(m, 2H), 7.34-7.28(m, 3H), 7.08-7.02(m, 4H), 6.84-6.80(m, 2H), 6.78-6.75(m, 2H), 3.79-3.77(d, *J* = 7.0 Hz, 6H) ppm. ESI-MS: *m/z* 461.3 [M+H]<sup>+</sup>.

The synthetic procedures of **SWJT-12** were shown in Scheme 1. **M-CHO** (46 mg, 0.1 mmol) and 2,3-diaminodinitrile (12 mg, 0.12 mmol) were dissolved in absolute ethanol (8 mL), and 1 drop of concentrated sulfuric acid was added. Then, the solution was stirred at 78 °C for 30 min. After cooling to room temperature, the precipitate was filtered, washed with absolute ethanol, and then washed with distilled water to obtain **SWJT-12** as a yellow powder with a yield of 85%. <sup>1</sup>H NMR (400 MHz, CDCl<sub>3</sub>): δ 8.29 (s, 1H), 7.66–7.64 (d, *J* = 8.1 Hz, 2H), 7.53–7.48 (t, *J* = 9.2 Hz, 4H), 7.35–7.26 (q, *J* = 6.6 Hz, 3H), 7.08–7.03 (dd, *J* = 13.5, 7.4 Hz, 4H), 6.83–6.75 (dd, *J* = 23.3, 8.3 Hz, 4H), 5.57 (s, 2H), 3.78–3.77 (d, *J* = 6.7 Hz, 6H) ppm. <sup>13</sup>C NMR (100 MHz, CDCl<sub>3</sub>) δ 159.35, 158.61, 157.71, 138.65, 137.06, 134.22, 134.06, 132.35, 129.32, 129.00, 128.82, 128.60, 128.53, 128.42, 126.91, 124.99, 122.40, 113.93, 113.74, 107.72, 77.36, 77.04, 76.73, 55.22, 55.15 ppm. ESI-MS: *m/z* 551.3 [M+H]<sup>+</sup>. HRMS (ESI): calcd for C<sub>34</sub>H<sub>27</sub>N<sub>6</sub>O<sub>2</sub> [M+H]<sup>+</sup> 551.2190, found 551.2192.

4.  $^1\text{H}$  NMR and ESI-MS copies of M-CHO.

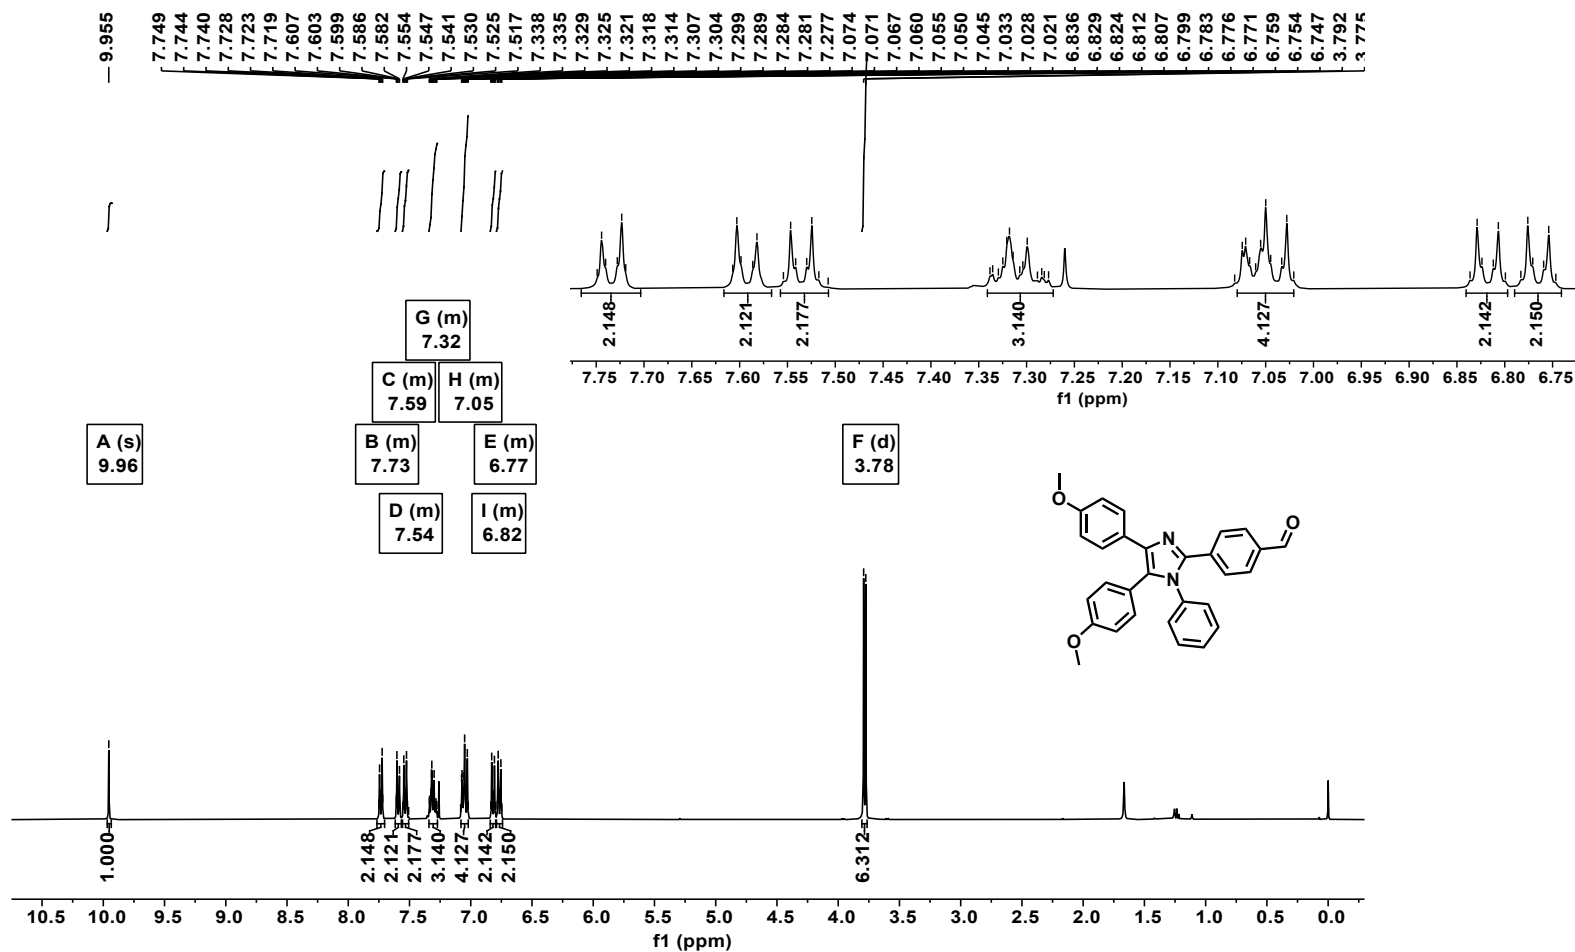

Figure S1.  $^1\text{H}$  NMR spectrum of probe M-CHO (400 MHz,  $\text{CDCl}_3$ ).

## Generic Display Report

Analysis Info  
Analysis Name D:\Data\yangy\newWANGBAOJUN20220512\_1\_21\_01\_45694.d Acquisition Date 5/12/2022 12:51:05 PM  
Method POS\_100-1200\_For LC.m Operator LZU  
Sample Name WANGBAOJUN20220512\_1 Instrument micrOTOF  
Comment

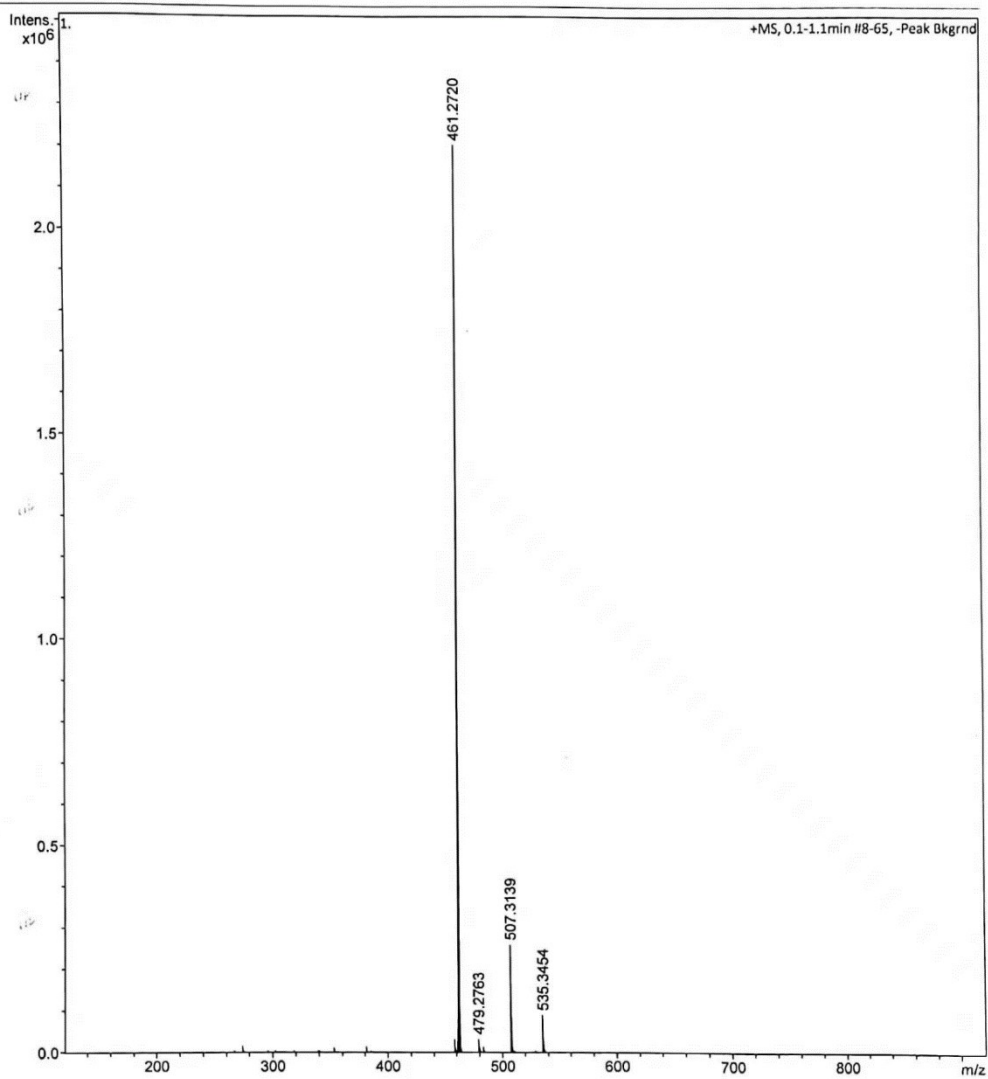

**Figure S2.** ESI-MS spectrum of M-CHO.

## 5. NMR and MS copies of SWJT-12.

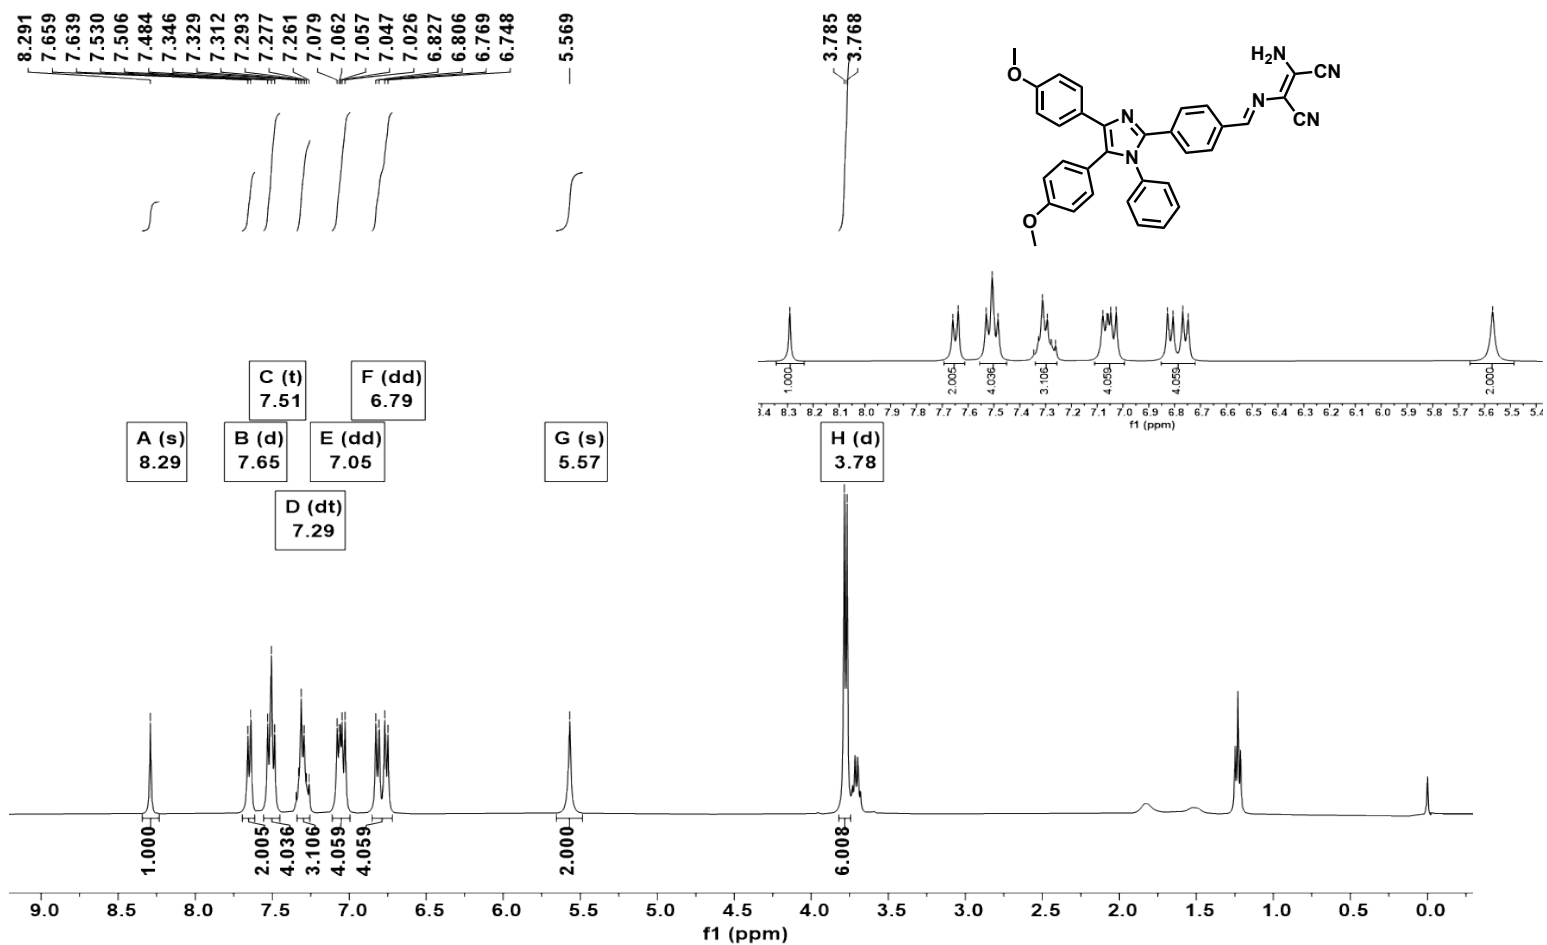

Figure S3.  $^1\text{H}$  NMR spectrum of probe SWJT-12 (400 MHz,  $\text{CDCl}_3$ ).



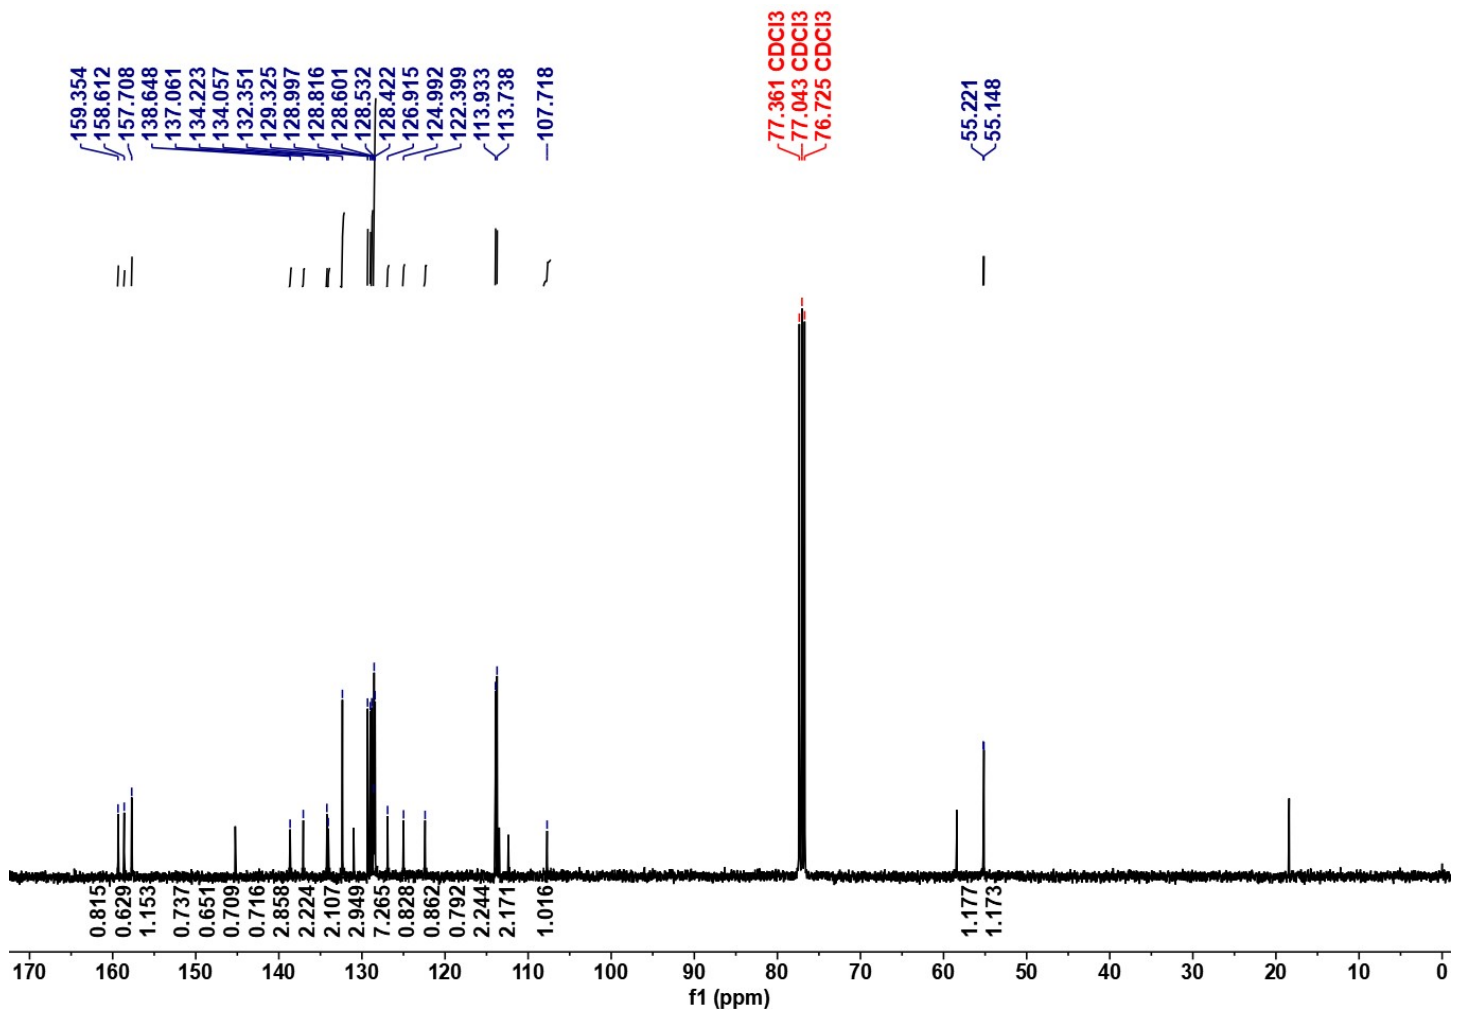

Figure S4.  $^{13}\text{C}$  NMR spectrum of probe SWJT-12 (100 MHz,  $\text{CDCl}_3$ ).

## Generic Display Report

|                      |                                                      |                  |                       |
|----------------------|------------------------------------------------------|------------------|-----------------------|
| <b>Analysis Info</b> |                                                      | Acquisition Date | 5/12/2022 12:54:12 PM |
| Analysis Name        | D:\Data\yangy\new\WANGBAOJUN20220512_2_22_01_45695.d | Operator         | LZU                   |
| Method               | POS_100-1200_For LC.m                                | Instrument       | micrOTOF              |
| Sample Name          | WANGBAOJUN20220512_2                                 |                  |                       |
| Comment              |                                                      |                  |                       |

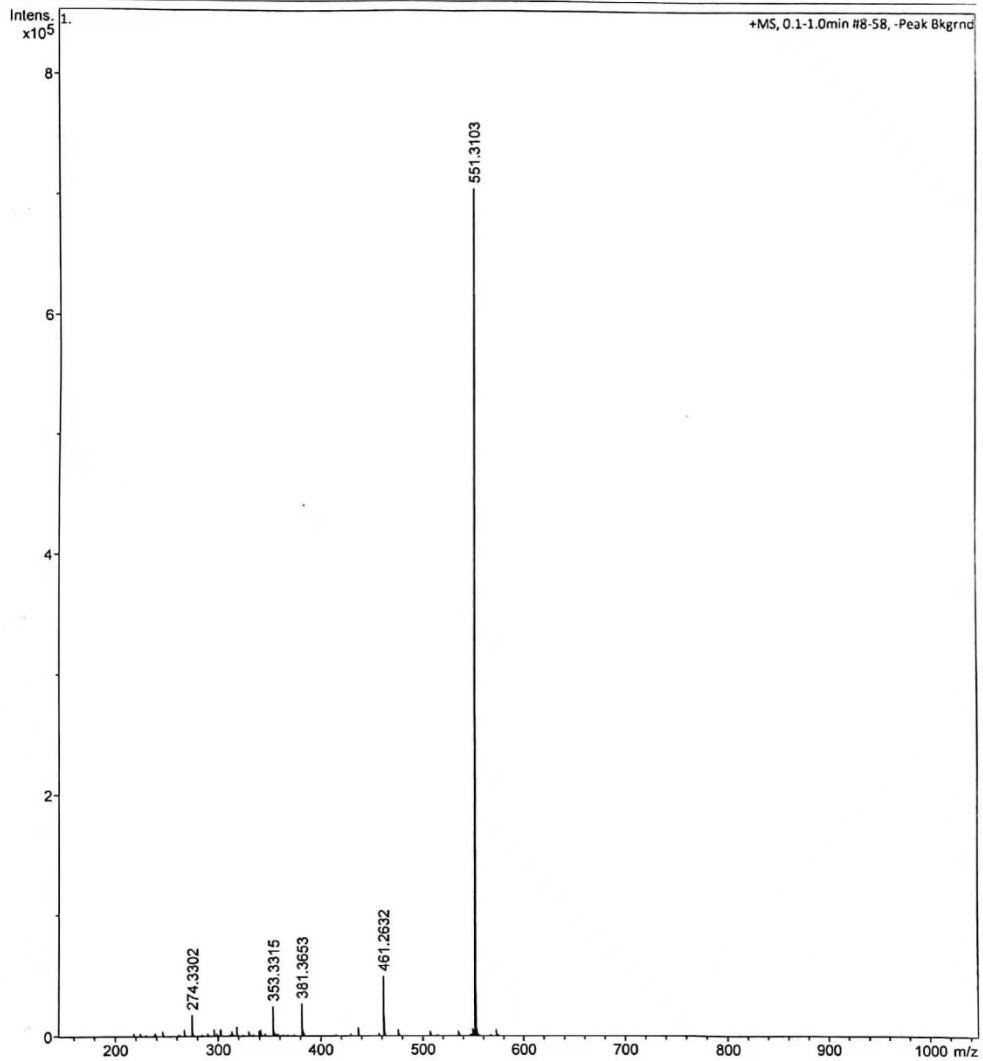

**Figure S5.** ESI-MS spectrum of probe SWJT-12.

## Display Report

**Analysis Info**  
Analysis Name: D:\Data\220630\S-1209-2\_RA1\_01\_868.d  
Method: LCMS.m  
Sample Name: S-1209-2  
Comment:  
Acquisition Date: 12/9/2022 4:55:44 PM  
Operator: BDAL@DE  
Instrument: micrOTOF-Q III 8228888.20485

**Acquisition Parameter**

|             |          |                       |           |                  |           |
|-------------|----------|-----------------------|-----------|------------------|-----------|
| Source Type | ESI      | Ion Polarity          | Positive  | Set Nebulizer    | 2.0 Bar   |
| Focus       | Active   | Set Capillary         | 3000 V    | Set Dry Heater   | 200 °C    |
| Scan Begin  | 50 m/z   | Set End Plate Offset  | -500 V    | Set Dry Gas      | 8.0 l/min |
| Scan End    | 1000 m/z | Set Collision Cell RF | 140.0 Vpp | Set Divert Valve | Waste     |

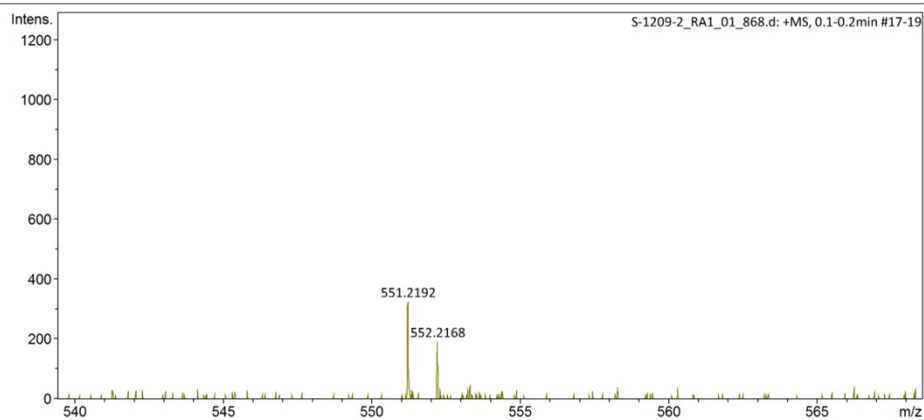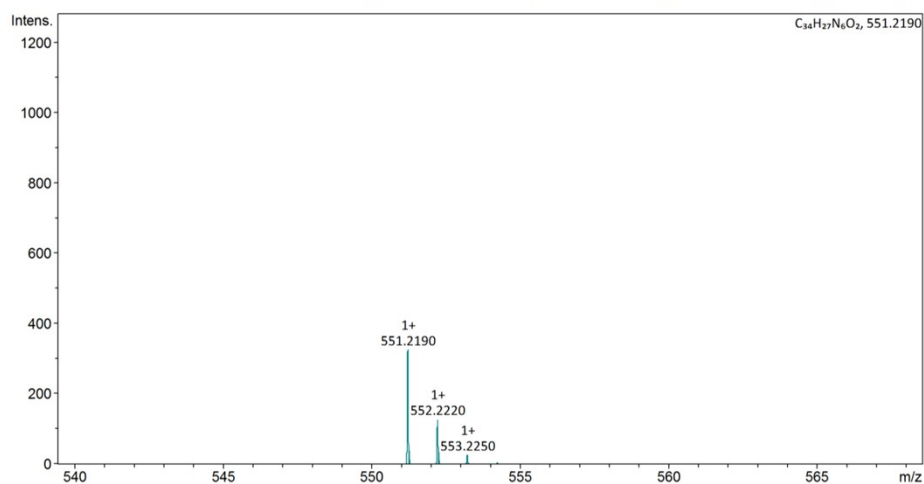

**Figure S6.** HRMS spectrum of probe SWJT-12

## 6. Basic properties of SWJT-12.

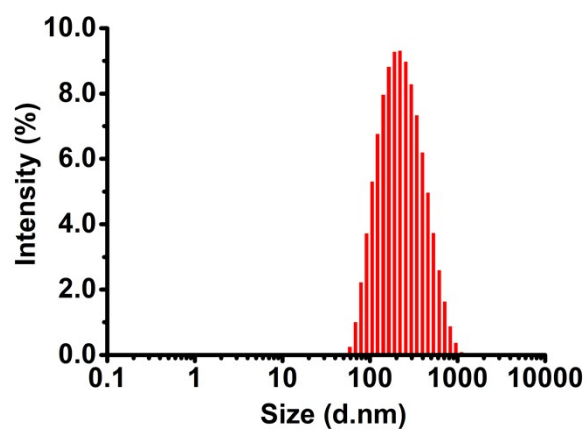

**Figure S7.** Size distribution of SWJT-12 in the aggregated state in 98% PBS buffer solution (pH = 7.4).

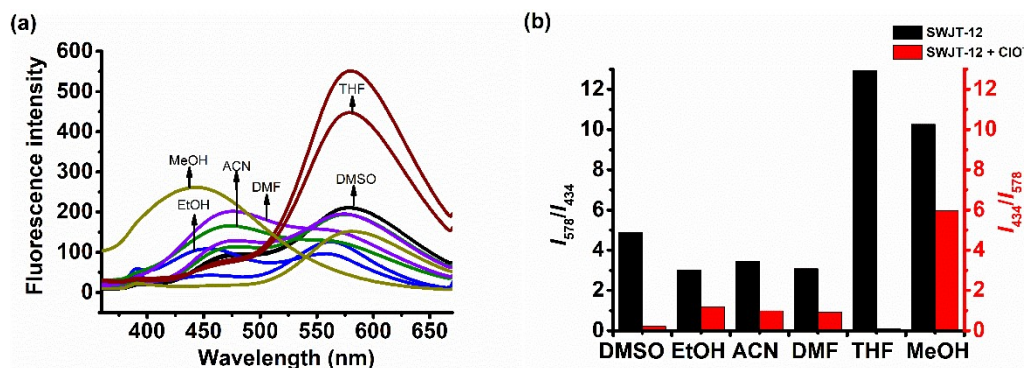

**Figure S8.** Fluorescence spectra of SWJT-12 in different solvents in the absence and presence of  $\text{ClO}^-$  ( $90.0 \mu\text{M}$ ) in 98% PBS buffer solution ( $\text{pH} = 7.4$ ) ( $\lambda_{\text{ex}} = 340 \text{ nm}$ ).

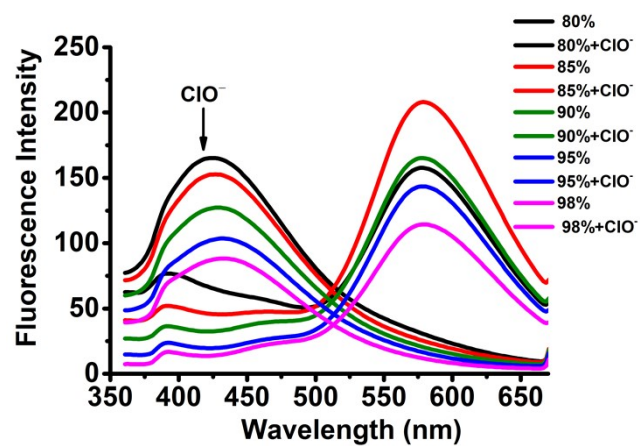

**Figure S9.** Fluorescence intensity versus the content of the CH<sub>3</sub>OH/PBS mixture of SWJT-12 in the presence of ClO<sup>-</sup> (90.0 μM) ( $\lambda_{\text{ex}} = 340$  nm).

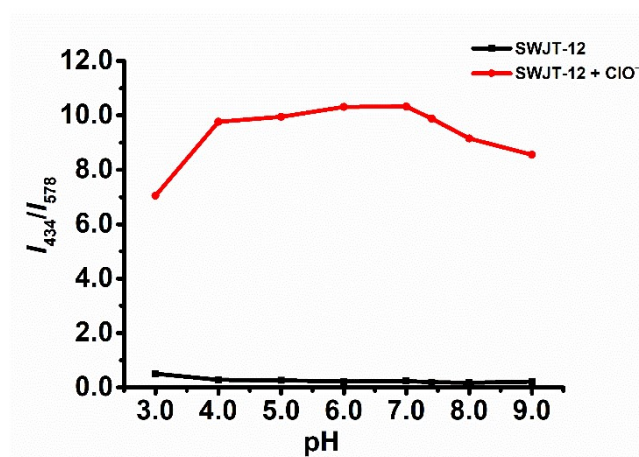

**Figure S10.** Fluorescence responses of SWJT-12 and SWJT-12 + ClO<sup>-</sup> (90.0  $\mu$ M) in PBS buffer solution (2% CH<sub>3</sub>OH) under different pH conditions ( $\lambda_{\text{ex}} = 340$  nm).

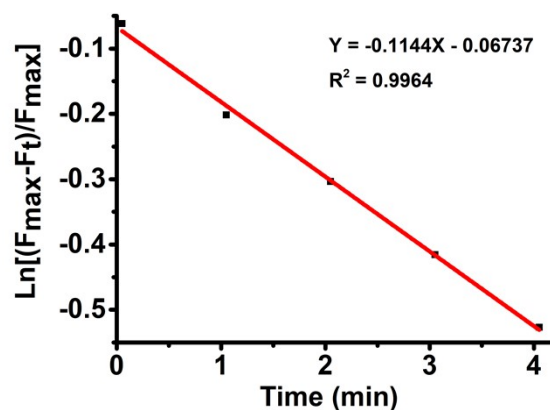

**Figure S11.** Pseudo first-order kinetic plots of **SWJT-12** (10.0  $\mu\text{M}$ ) with the addition of  $\text{ClO}^-$  in PBS buffer solution (2%  $\text{CH}_3\text{OH}$ ,  $\text{pH} = 7.4$ ) ( $\lambda_{\text{ex}} = 340 \text{ nm}$ ).

The result of the analysis as follows:

$$\ln [(F_{\text{max}} - F_t) / (F_{\text{max}})] = -k_{\text{obs}}t$$

$$t_{1/2} = \ln 2 / k_{\text{obs}}$$

Where  $F_{\text{max}}$  and  $F_t$  are the fluorescent intensity at maximum emission wavelength, and time  $t$ .  $k_{\text{obs}}$  is the pseudo-first-order rate constant.

$$k_{\text{obs}} = 1.91 \times 10^{-3} \text{ s}^{-1}$$

$$t_{1/2} = 6.06 \text{ min}$$



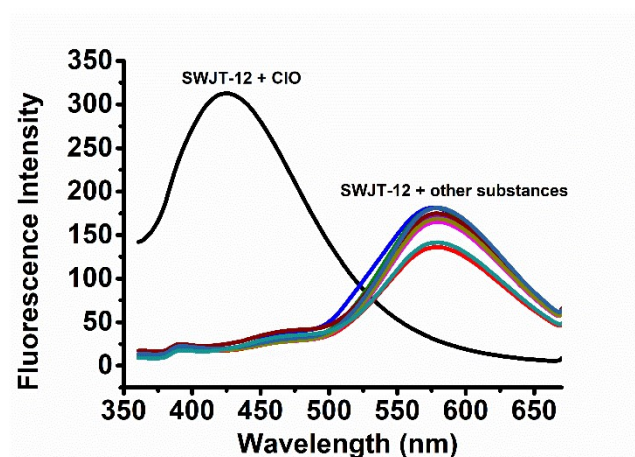

**Figure S12.** Selectivity studies of SWJT-12 (10.0  $\mu\text{M}$ ) for different kinds of analytes (90.0  $\mu\text{M}$ ) ( $\lambda_{\text{ex}} = 340 \text{ nm}$ ).

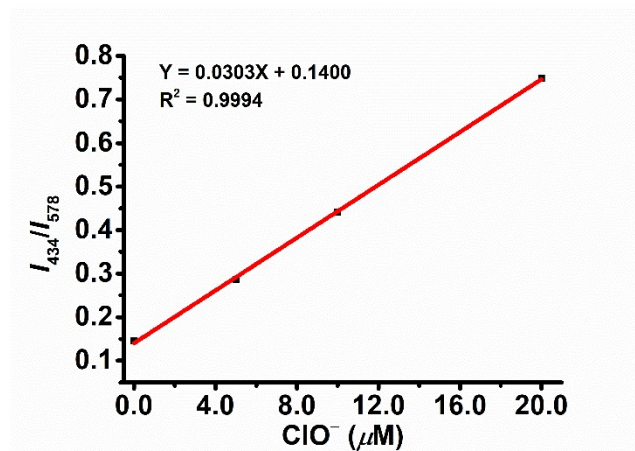

**Figure S13.** Linear relationship between the ratio of fluorescence at 434 nm and 578 nm and ClO<sup>-</sup> concentration from 0.0 to 20.0 μM in PBS buffer solution (2% CH<sub>3</sub>OH, pH = 7.4) (λ<sub>ex</sub> = 340 nm).

The below equation was used for the plot that determined the LOD.

The result of the analysis as follows:

$$\text{Linear Equation: } Y = 0.0303 \times X + 0.1400$$

$$\delta = \sqrt{\frac{\sum (F_0 - \bar{F}_0)^2}{N - 1}} = 0.0028 \text{ (N = 10); } \quad S = 0.0303; \quad K=3;$$

$$\text{LOD} = K \times \delta / S = 0.28 \mu\text{M}$$

7. LC-MS spectrum of probe SWJT-12 and ClO<sup>-</sup>.

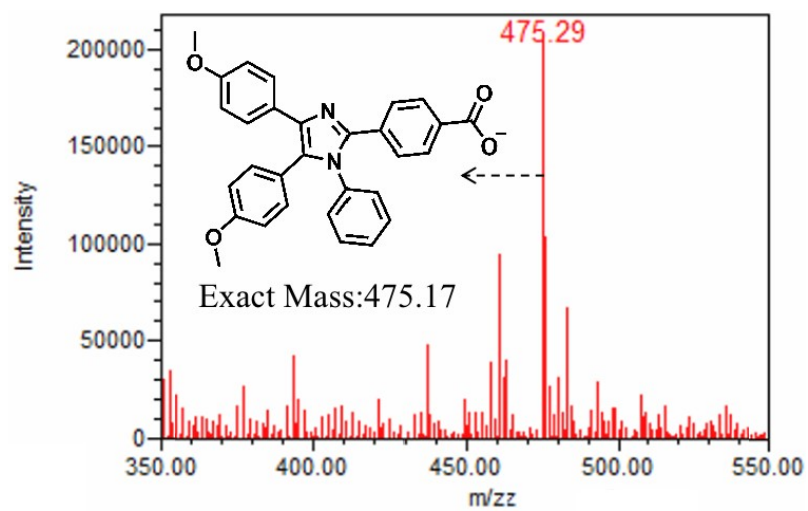

**Figure S14.** LC-MS profiles of SWJT-12 and ClO<sup>-</sup> (1.0 equiv).

## 8. Energy distribution of SWJT-12 and MB.

| No. | Energy (cm <sup>-1</sup> ) | Wavelength (nm) | Osc. Strength | Symmetry  | Major contribs                                          | Minor contribs                                                                             |
|-----|----------------------------|-----------------|---------------|-----------|---------------------------------------------------------|--------------------------------------------------------------------------------------------|
| 1   | 19348.56784                | 516.834118      | 0.4325        | Singlet-A | HOMO->LUMO (99%)                                        |                                                                                            |
| 2   | 26042.20928                | 383.992         | 0.6674        | Singlet-A | H-2->LUMO (12%),<br>H-1->LUMO (84%)                     |                                                                                            |
| 3   | 27656.9424                 | 361.57287       | 0.3115        | Singlet-A | H-2->LUMO (71%),<br>HOMO->L+1 (21%)                     | H-1->LUMO (6%)                                                                             |
| 4   | 28981.31392                | 345.04992       | 0.0651        | Singlet-A | H-2->LUMO (13%),<br>HOMO->L+1 (62%)                     | H-4->LUMO (5%),<br>H-3->LUMO (5%),<br>H-1->LUMO (6%),<br>HOMO->L+2 (6%),<br>HOMO->L+3 (3%) |
| 5   | 30336.33472                | 329.63771       | 0.0242        | Singlet-A | HOMO->L+2 (85%)                                         | H-4->LUMO (4%),<br>H-3->LUMO (4%),<br>HOMO->L+1 (3%)                                       |
| 6   | 30729.936                  | 325.41558       | 0.015         | Singlet-A | H-3->LUMO (11%),<br>HOMO->L+3 (82%)                     | HOMO->L+2 (4%)                                                                             |
| 7   | 31046.91408                | 322.0932        | 0.0109        | Singlet-A | H-3->LUMO (75%),<br>HOMO->L+3 (10%)                     | H-4->LUMO (8%),<br>HOMO->L+1 (4%)                                                          |
| 8   | 31659.09312                | 315.86502       | 0.0178        | Singlet-A | H-4->LUMO (73%),<br>H-1->L+1 (11%)                      | HOMO->L+1 (7%),<br>HOMO->L+2 (2%),<br>HOMO->L+3 (2%)                                       |
| 9   | 32625.352                  | 306.5101        | 0.0006        | Singlet-A | H-6->LUMO (37%),<br>H-5->LUMO (46%)                     | HOMO->L+6 (7%)                                                                             |
| 10  | 33238.3376                 | 300.85741       | 0.0024        | Singlet-A | H-7->LUMO (19%),<br>H-6->LUMO (21%),<br>H-5->LUMO (38%) | HOMO->L+4 (9%),<br>HOMO->L+5 (5%),<br>HOMO->L+6 (4%)                                       |

**Figure S15.** Energy distribution of SWJT-12.

| No. | Energy (cm <sup>-1</sup> ) | Wavelength (nm) | Osc. Strength | Symmetry  | Major contribs                      | Minor contribs                                       |
|-----|----------------------------|-----------------|---------------|-----------|-------------------------------------|------------------------------------------------------|
| 1   | 25770.39856                | 388.0421165     | 0.3159        | Singlet-A | HOMO->LUMO (99%)                    |                                                      |
| 2   | 30642.82752                | 326.3406418     | 0.0347        | Singlet-A | HOMO->L+1 (90%)                     | HOMO->L+2 (7%)                                       |
| 3   | 31235.64912                | 320.1470205     | 0.0192        | Singlet-A | HOMO->L+2 (91%)                     | HOMO->L+1 (7%)                                       |
| 4   | 32922.97264                | 303.7392798     | 0.1872        | Singlet-A | H-1->LUMO (97%)                     |                                                      |
| 5   | 33515.79424                | 298.3667917     | 0.0697        | Singlet-A | HOMO->L+3 (75%),<br>HOMO->L+4 (22%) |                                                      |
| 6   | 34203.78992                | 292.365262      | 0.1534        | Singlet-A | HOMO->L+3 (21%),<br>HOMO->L+4 (74%) |                                                      |
| 7   | 35794.32624                | 279.3738855     | 0.0168        | Singlet-A | H-5->LUMO (10%),<br>HOMO->L+5 (74%) | H-4->LUMO (7%),<br>H-2->LUMO (4%)                    |
| 8   | 36124.20928                | 276.8226682     | 0.3004        | Singlet-A | H-2->LUMO (89%)                     | HOMO->L+5 (3%),<br>HOMO->L+7 (2%)                    |
| 9   | 37384.056                  | 267.4937144     | 0.0405        | Singlet-A | H-3->LUMO (84%)                     | H-8->LUMO (3%),<br>H-6->LUMO (2%),<br>H-4->LUMO (6%) |
| 10  | 37602.63376                | 265.9388186     | 0.0112        | Singlet-A | HOMO->L+6 (78%)                     | H-3->L+3 (4%),<br>H-3->L+7 (3%),<br>HOMO->L+7 (8%)   |

**Figure S16.** Energy distribution of **MB**.

**9. Cytotoxicity of SWJT-12 in living HeLa cells.**

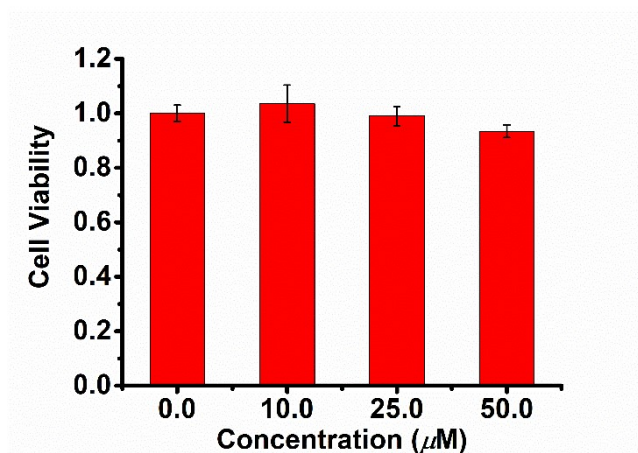

**Figure S17.** The viability of HeLa cells was determined by MTT assay after incubation with different concentrations of **SWJT-12** for 24 h.
